# Supplementary material
Source: PubMed Central journal article supplement (PMC1413728)

**A**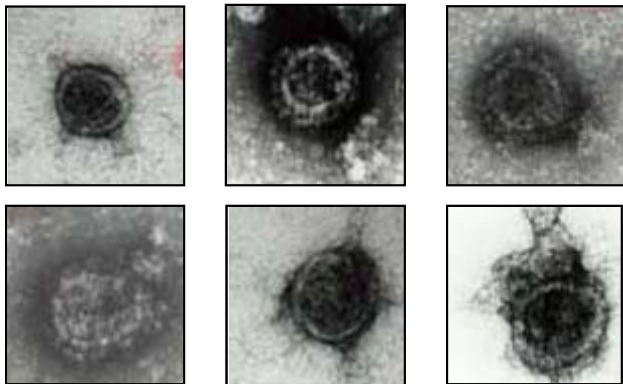**B**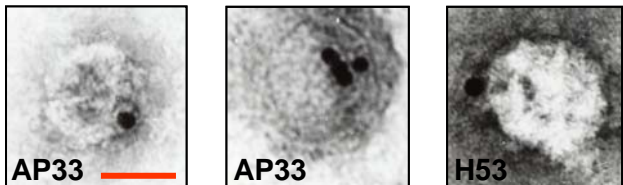

Supplement: pnas_0510727103_1.pdf [file pnas_0510727103_1.pdf]

# Fraction

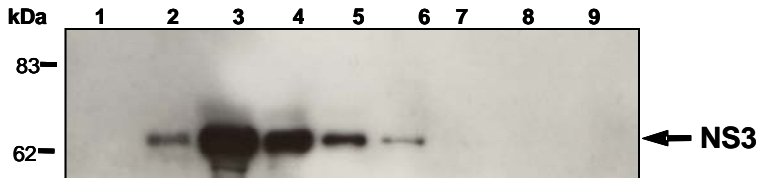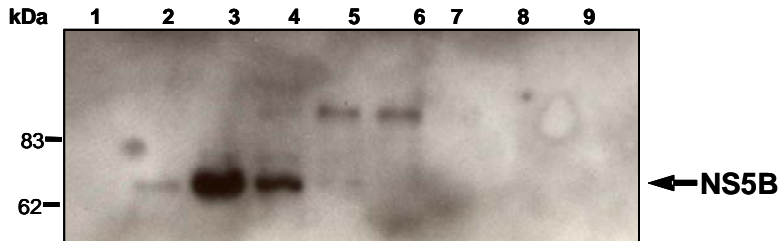

Supplement: pnas_0510727103_2.pdf [file pnas_0510727103_2.pdf]
